# Supplementary material for: Photomechanical Energy Conversion of Photoresponsive Fibers Exhibiting Bending Behavior
Source: Hindawi journal article supplement (doi:10.1155/2012/574124), 2012-01-01
Supplement: f1 [file 574124.f1.pdf]

Supporting information

**Photo-Mechanical Energy Conversion of  
Photoresponsive Fibers Exhibiting Bending  
Behavior**

*Kazuya Nakata, Yosuke Ishikawa, Munetoshi Sakai, Baoshun Liu, Tsuyoshi Ochiai,*

*Hideki Sakai, Taketoshi Murakami, Masahiko Abe, Akira Fujishima*

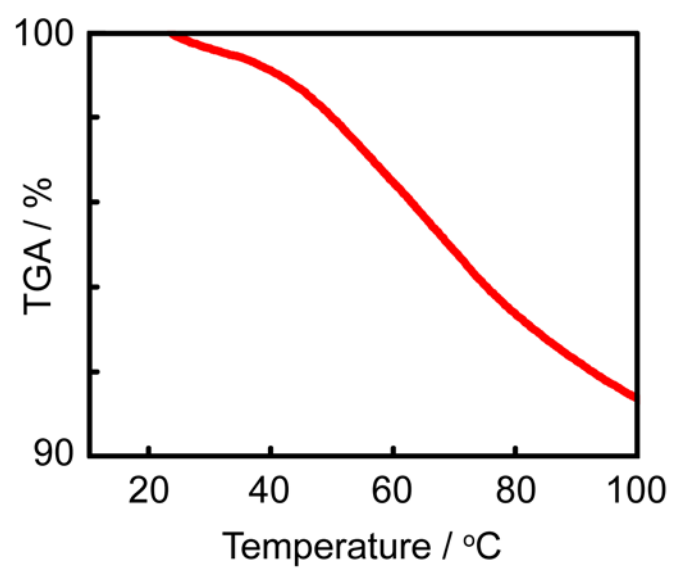

**Fig. S1.** Thermogravimetric analysis of PAA/MB fiber.
